# Supplementary material
Source: PubMed Central journal article supplement (PMC6324178)

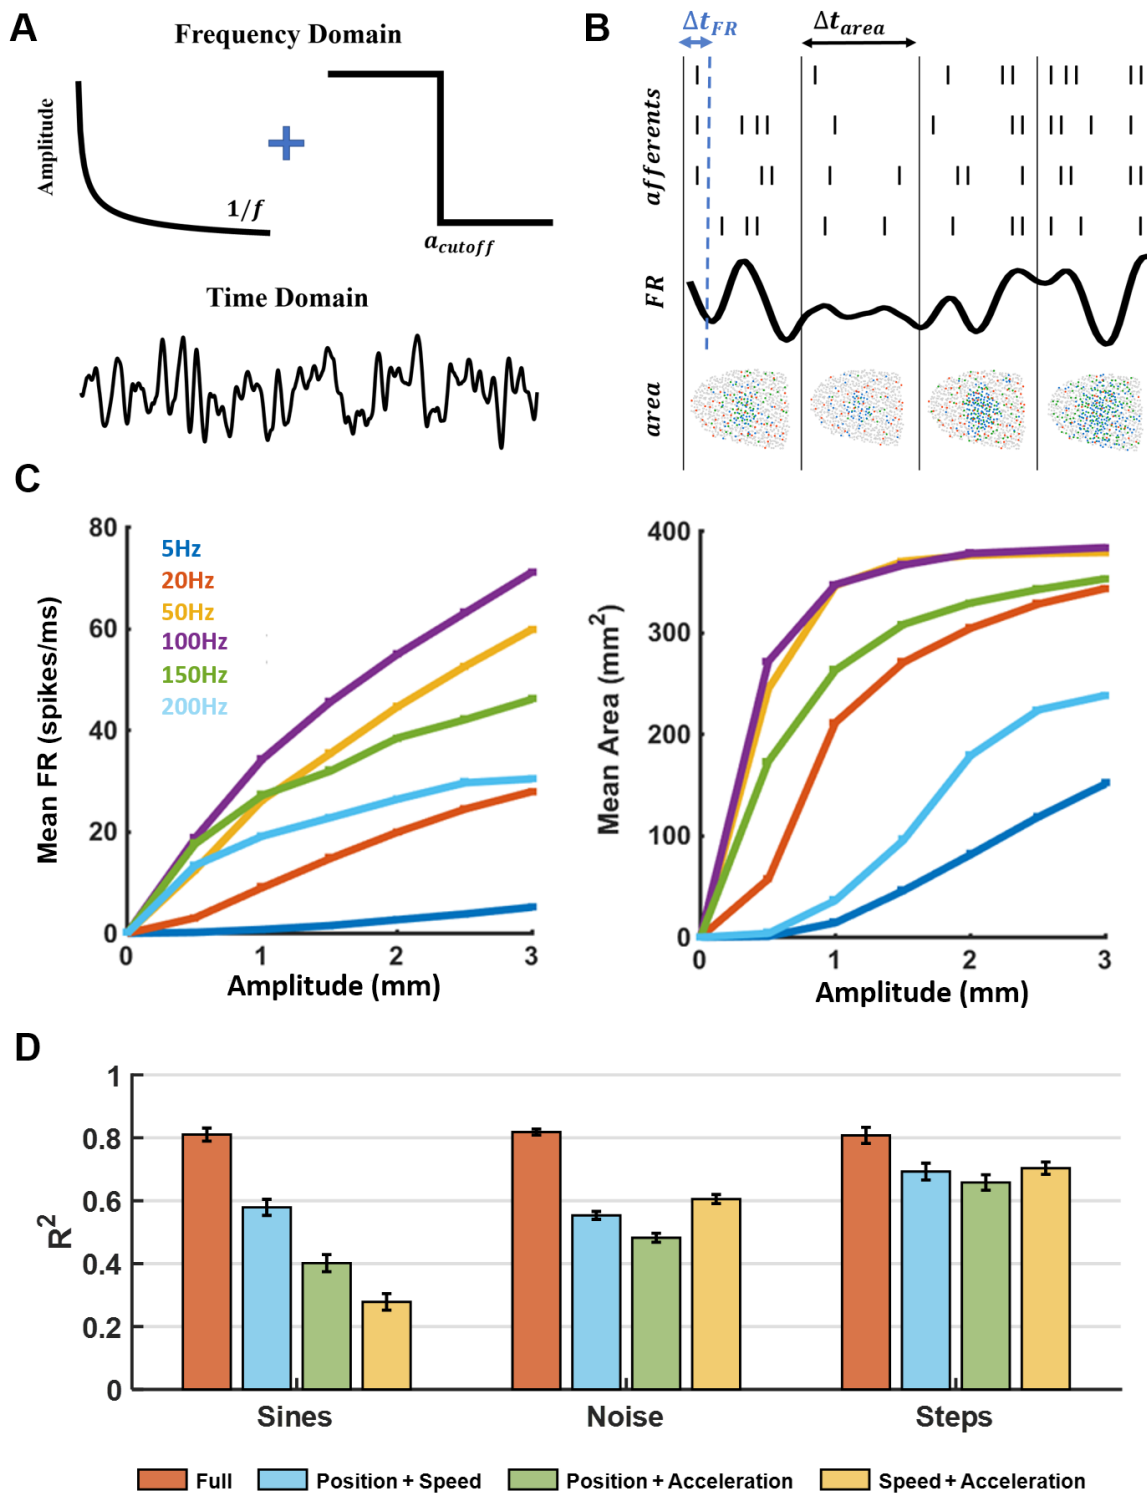

Supplement: NIHMS1511692-supplement-JNE_15_6_066033_suppdata_figure_1_pdf.pdf [file NIHMS1511692-supplement-JNE_15_6_066033_suppdata_figure_1_pdf.pdf]

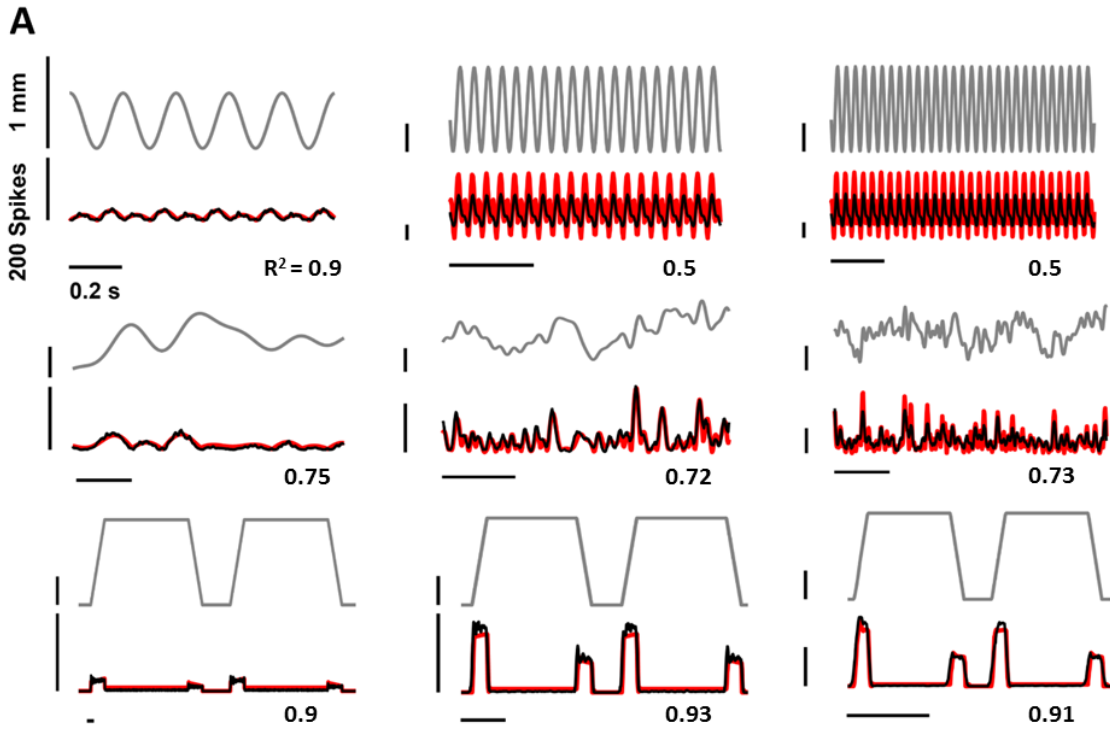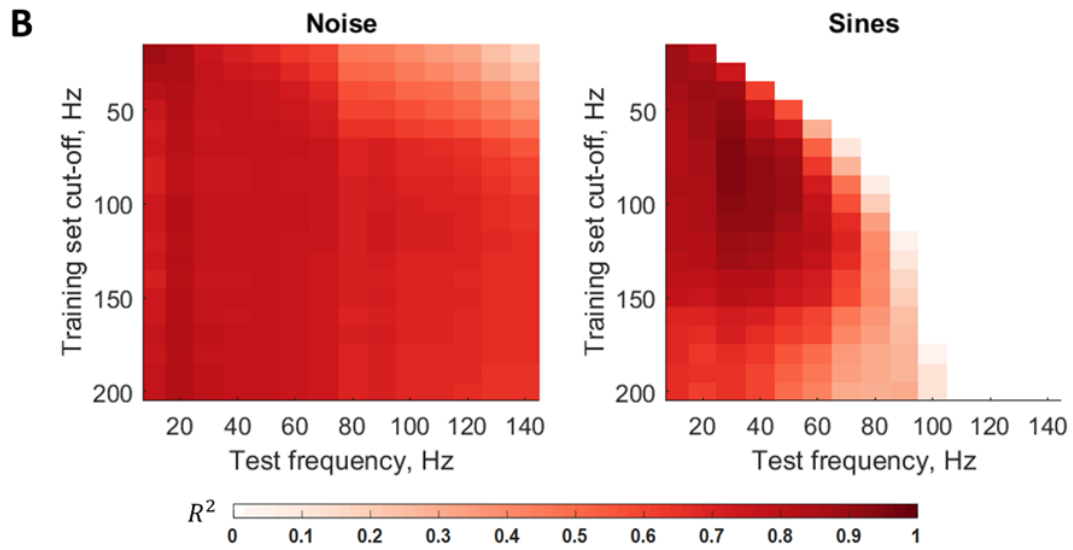

Supplement: NIHMS1511692-supplement-JNE_15_6_066033_suppdata_figure_2_pdf.pdf [file NIHMS1511692-supplement-JNE_15_6_066033_suppdata_figure_2_pdf.pdf]

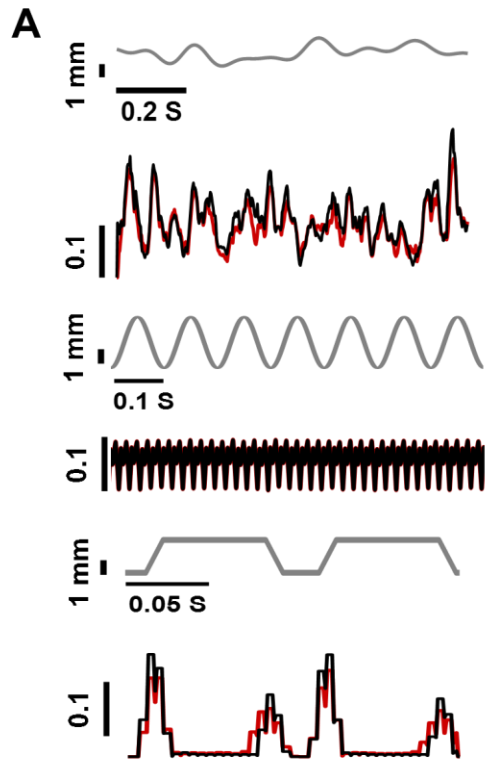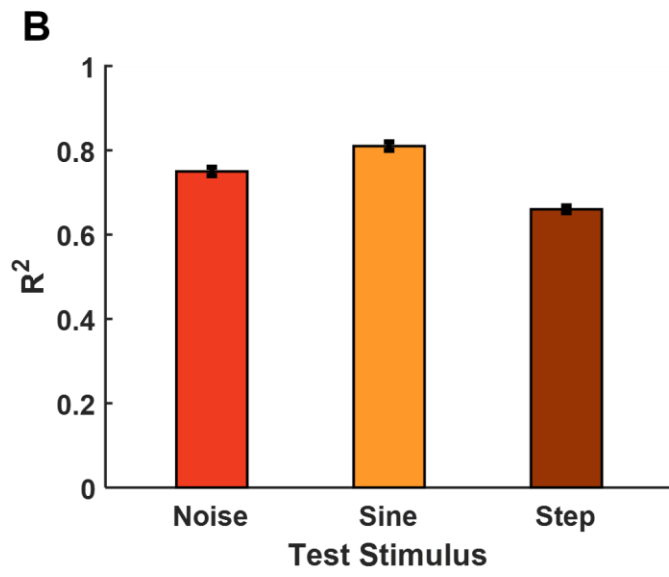

Supplement: NIHMS1511692-supplement-JNE_15_6_066033_suppdata_figure_3_pdf.pdf [file NIHMS1511692-supplement-JNE_15_6_066033_suppdata_figure_3_pdf.pdf]

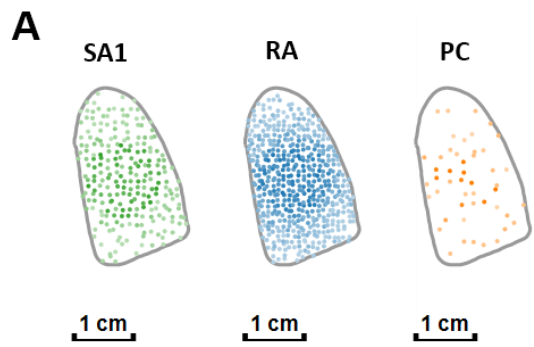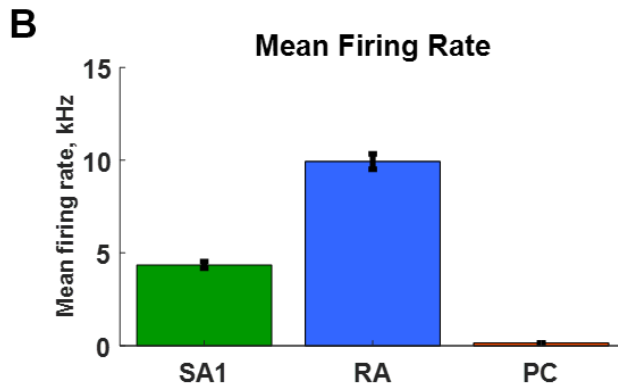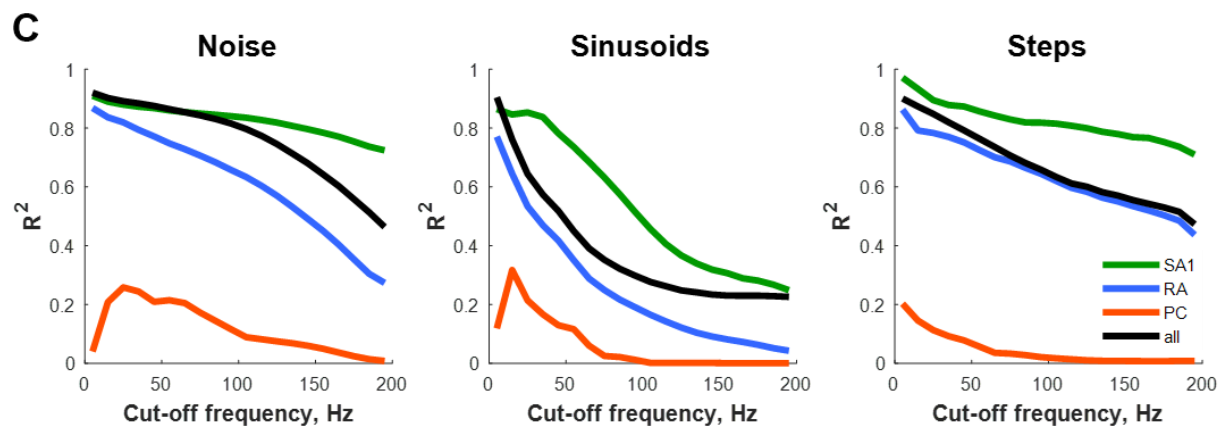

Supplement: NIHMS1511692-supplement-JNE_15_6_066033_suppdata_figure_4_pdf.pdf [file NIHMS1511692-supplement-JNE_15_6_066033_suppdata_figure_4_pdf.pdf]
